# Supplementary material for: Frequency-modulated electromagnetic neural stimulation (FREMS) as a treatment for symptomatic diabetic neuropathy: results from a double-blind, randomised, multicentre, long-term, placebo-controlled clinical trial
Source: PubMed Central journal article supplement — Diabetologia. 2012 Dec 13;56(3):467–75. doi: 10.1007/s00125-012-2795-7 (PMC3563945; doi:10.1007/s00125-012-2795-7), 2012-12-13
Supplement: 125_2012_2795_MOESM1_ESM.pdf [file 125_2012_2795_MOESM1_ESM.pdf]

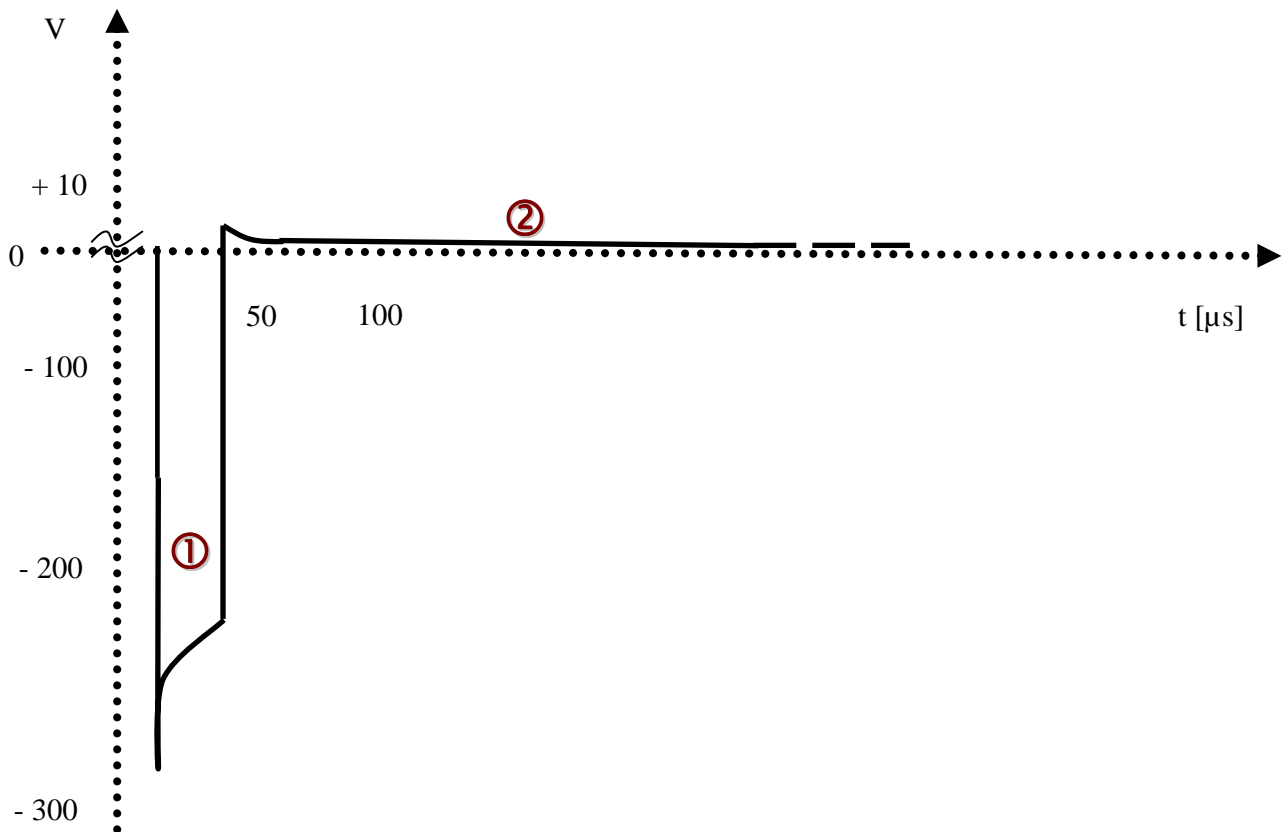

**Figure 1. Supplementary material.** Profile of FREMS stimulus, consisting of sequences of biphasic (negative and positive), asymmetric and electrically balanced pulses, composed of: 1) an active phase of high negative voltage spike (variable, max -300 V) and extra short duration (variable, 10-100  $\mu$ sec, mainly  $\sim$ 40  $\mu$ sec); followed by: 2) a recharging phase of low voltage and long duration (0.9 - 999 msec); pulse frequency was variable, ranging 1 to 1,000 Hz, mainly in the low range 1-50 Hz.
