# Supplementary material for: Frequency-modulated electromagnetic neural stimulation (FREMS) as a treatment for symptomatic diabetic neuropathy: results from a double-blind, randomised, multicentre, long-term, placebo-controlled clinical trial
Source: PubMed Central journal article supplement — Diabetologia. 2012 Dec 13;56(3):467–75. doi: 10.1007/s00125-012-2795-7 (PMC3563945; doi:10.1007/s00125-012-2795-7), 2012-12-13
Supplement: 125_2012_2795_MOESM2_ESM.pdf [file 125_2012_2795_MOESM2_ESM.pdf]

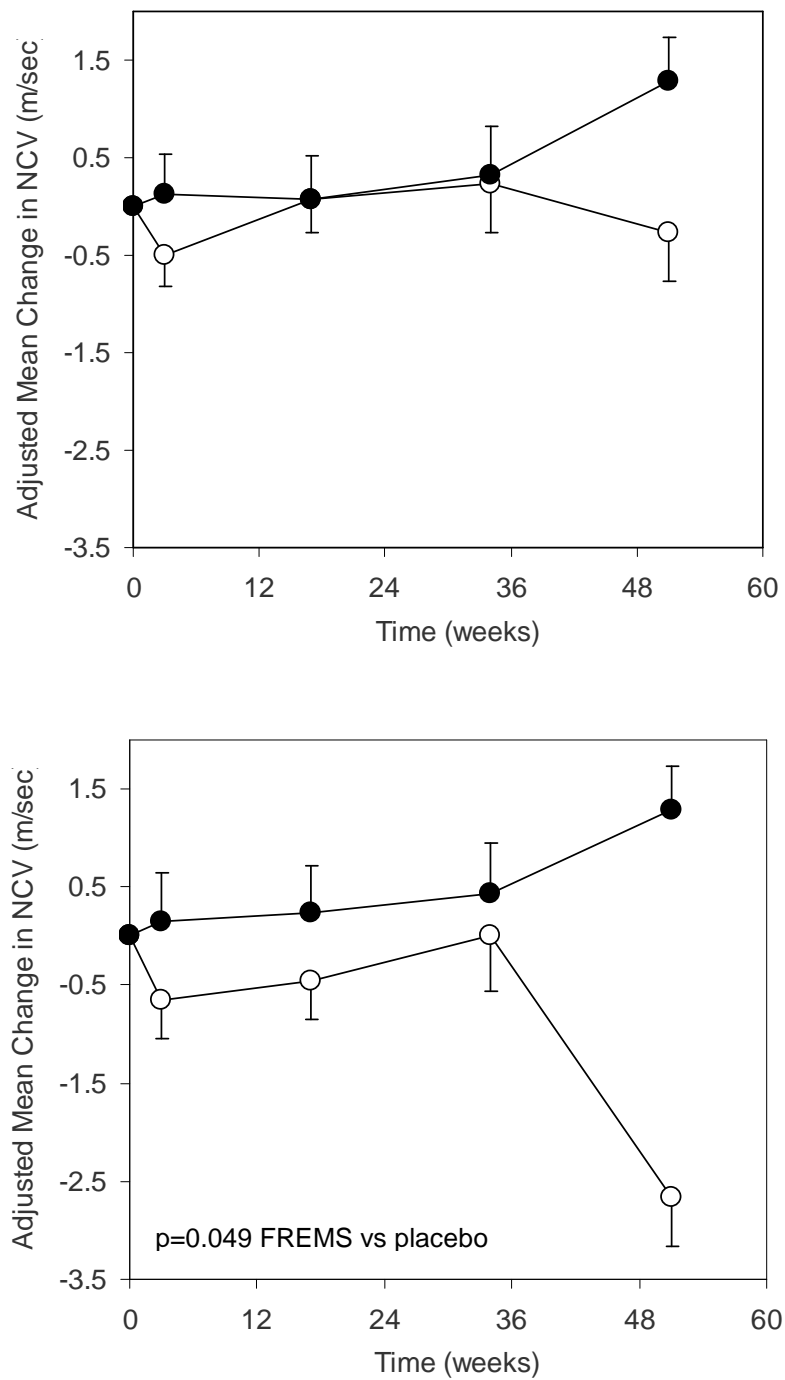

**Figure 2. Supplementary material.** Adjusted mean change and standard error of nerve conduction velocity (NCV) of deep peroneal nerve for study participants in the FREMS group (black circles) and in the placebo group (white circles) in the intention-to-treat population (upper panel) and per protocol population (lower panel).
