# Supplementary material for: Frequency-modulated electromagnetic neural stimulation (FREMS) as a treatment for symptomatic diabetic neuropathy: results from a double-blind, randomised, multicentre, long-term, placebo-controlled clinical trial
Source: PubMed Central journal article supplement — Diabetologia. 2012 Dec 13;56(3):467–75. doi: 10.1007/s00125-012-2795-7 (PMC3563945; doi:10.1007/s00125-012-2795-7), 2012-12-13
Supplement: 125_2012_2795_MOESM3_ESM.pdf [file 125_2012_2795_MOESM3_ESM.pdf]

**Table 1, supplementary material**

Night-time and day-time pain responders at the thresholds of  $\geq 30\%$  or  $\geq 50\%$  for the three treatment cycles of either placebo or FREMS (ITT population).

| <b>Night time pain</b>                                                        |                  |                  |                  |
|-------------------------------------------------------------------------------|------------------|------------------|------------------|
|                                                                               | <b>1st cycle</b> | <b>2nd cycle</b> | <b>3rd cycle</b> |
| <b>Proportion of patients with <math>\geq 30\%</math> VAS night reduction</b> |                  |                  |                  |
| n                                                                             | 86               | 72               | 57               |
| placebo                                                                       | 10.9 %           | 35.1 %           | 27.6 %           |
| FREMS                                                                         | 15.0 %           | 62.9 %           | 64.3 %           |
| p-value                                                                       | 0.748            | <b>0.019</b>     | <b>0.008</b>     |
| <b>Proportion of patients with <math>\geq 50\%</math> VAS night reduction</b> |                  |                  |                  |
| n                                                                             | 86               | 72               | 57               |
| placebo                                                                       | 4.4 %            | 18.9 %           | 24.1 %           |
| FREMS                                                                         | 0.0 %            | 45.7 %           | 53.6 %           |
| p-value                                                                       | 0.182            | <b>0.015</b>     | <b>0.022</b>     |
| <b>Day time pain</b>                                                          |                  |                  |                  |
|                                                                               | <b>1st cycle</b> | <b>2nd cycle</b> | <b>3rd cycle</b> |
| <b>Proportion of patients with <math>\geq 30\%</math> VAS day reduction</b>   |                  |                  |                  |
| Number of patients                                                            | 92               | 67               | 60               |
| placebo                                                                       | 12.2 %           | 20.6 %           | 30.0 %           |
| FREMS                                                                         | 11.6 %           | 54.6 %           | 66.7 %           |
| p-value                                                                       | 1.000            | <b>0.004</b>     | <b>0.004</b>     |
| <b>Proportion of patients with <math>\geq 50\%</math> VAS day reduction</b>   |                  |                  |                  |
| Number of patients                                                            | 92               | 67               | 60               |
| placebo                                                                       | 6.1 %            | 14.7 %           | 23.3 %           |
| FREMS                                                                         | 11.6 %           | 42.4 %           | 50.0 %           |
| p-value                                                                       | 0.466            | <b>0.015</b>     | <b>0.032</b>     |
